# Supplementary material for: Culturing marine bacteria from the genus Pseudoalteromonas on a cotton scaffold alters secondary metabolite production
Source: PubMed Central journal article supplement (PMC6528606; doi:10.1002/mbo3.724), 2018-10-01
Supplement: MBO3-8-e00724-s001.pdf [file MBO3-8-e00724-s001.pdf]

## **Supplementary Information for “Culturing marine bacteria from the genus *Pseudoalteromonas* on a cotton scaffold activates silent biosynthetic pathways and alters secondary metabolite production”**

Marshall L. Timmermans, Katherine J. Picott, Lorena Ucciferri, Avena C. Ross

### **AntiSmash 4.0 Analysis of Bacterial Genomes**

| <b>Table S1.</b> Type of secondary metabolite biosynthetic gene clusters detected in <i>Pseudoalteromonas</i> sp. genome sequence data by antiSMASH 4.0 analysis [1]. |                                                          |                                                        |                                                      |
|-----------------------------------------------------------------------------------------------------------------------------------------------------------------------|----------------------------------------------------------|--------------------------------------------------------|------------------------------------------------------|
| <b>Type of natural product pathway</b>                                                                                                                                | <b><i>P. luteoviolacea</i> 2ta16<br/>(137 scaffolds)</b> | <b><i>P. piscicida</i> JCM 20779<br/>(2 scaffolds)</b> | <b><i>P. rubra</i> DSM 6842<br/>(194 scaffolds)*</b> |
| RiPPs                                                                                                                                                                 | 2                                                        | 3                                                      | 2                                                    |
| Non-ribosomal peptide (NRP)                                                                                                                                           | 3                                                        | 2                                                      | 3                                                    |
| Polyketide (PK)                                                                                                                                                       |                                                          |                                                        | 1                                                    |
| Hybrid (NRP/PK)                                                                                                                                                       | 4                                                        | 4 (including alterochromide pathway)                   | 1                                                    |
| Lantipeptide                                                                                                                                                          | 1                                                        |                                                        | 2                                                    |
| Homo serine lactone                                                                                                                                                   | 1                                                        |                                                        | 1                                                    |
| Indole                                                                                                                                                                | 1 (violacein pathway)                                    |                                                        |                                                      |
| Aryl polyene cluster                                                                                                                                                  | 1                                                        |                                                        |                                                      |
| Other                                                                                                                                                                 |                                                          |                                                        | 1                                                    |
| * Prodiginine pathway from <i>P. rubra</i> was not detected through antiSMASH 4.0                                                                                     |                                                          |                                                        |                                                      |

## Scanning Electron Microscopy

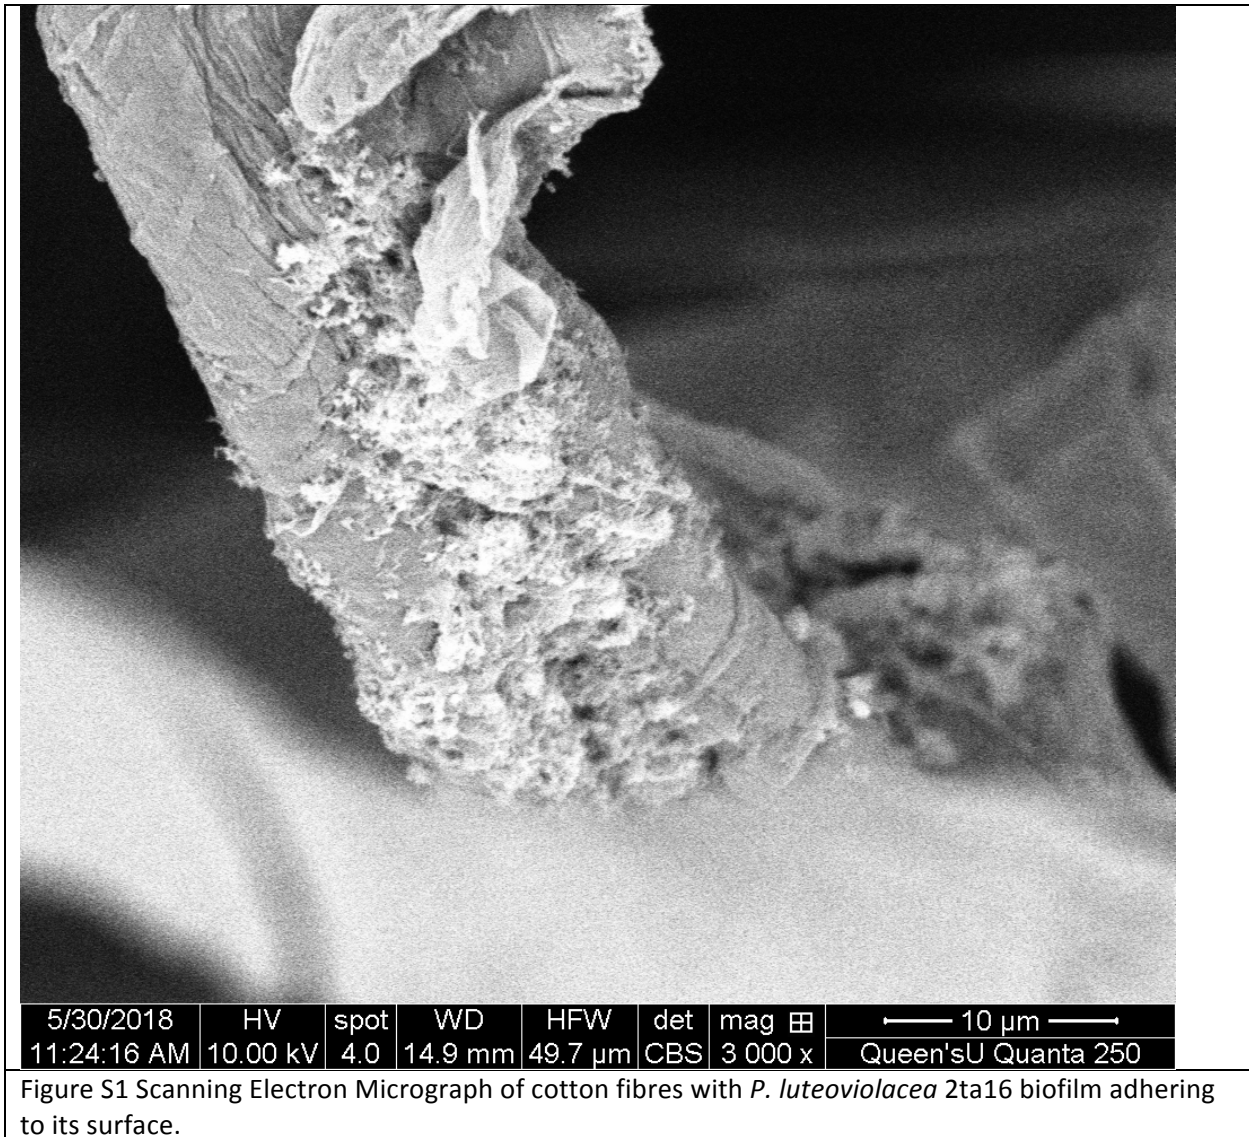

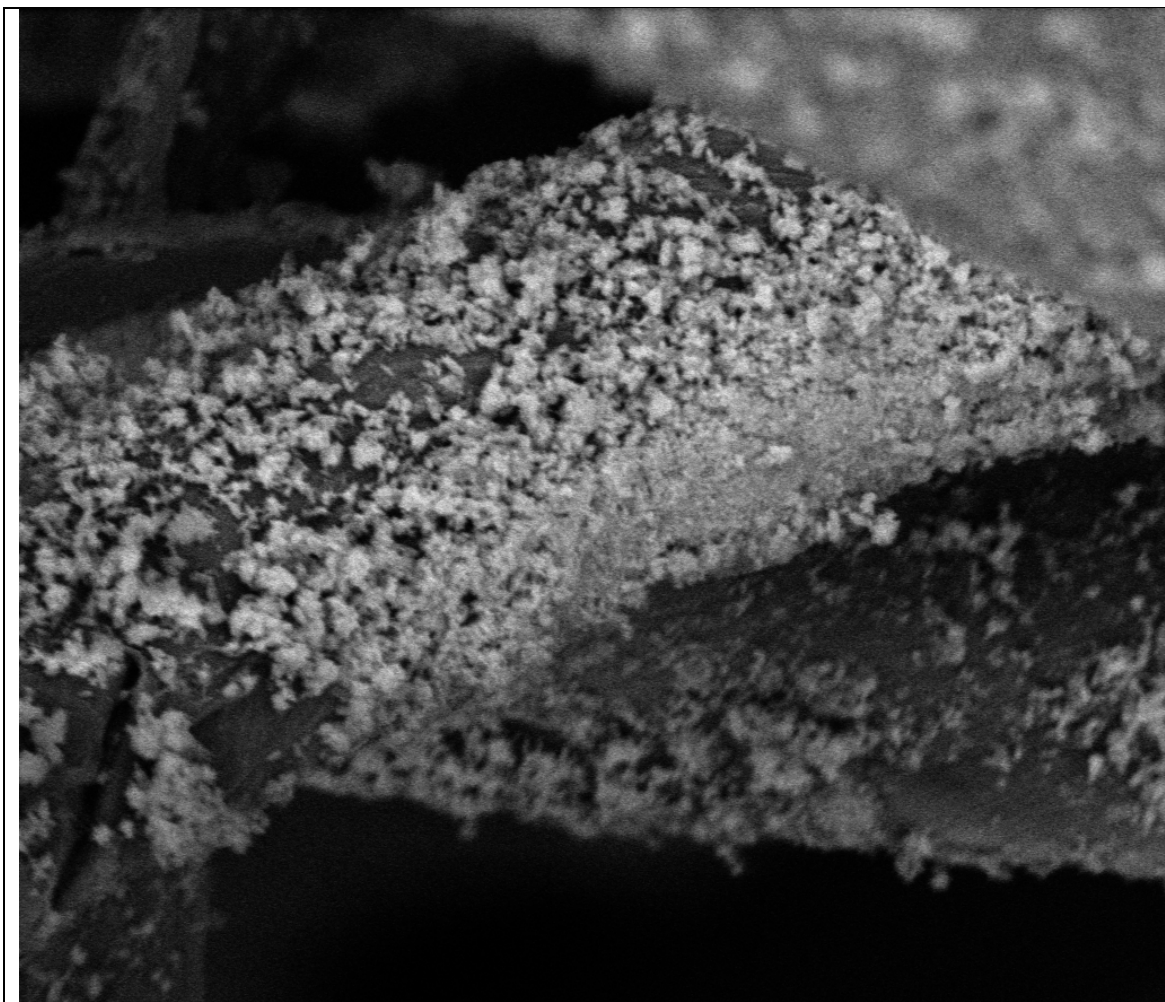

|             |          |      |         |         |     |         |   |                     |
|-------------|----------|------|---------|---------|-----|---------|---|---------------------|
| 5/30/2018   | HV       | spot | WD      | HFV     | det | mag     | 田 | 10 μm               |
| 11:11:58 AM | 10.00 kV | 4.0  | 15.9 mm | 49.7 μm | CBS | 3 000 x |   | Queen'sU Quanta 250 |

Figure S2: Scanning Electron Micrograph of cotton fibres with *P. piscicida* JCM 20779 biofilm adhering to its surface.

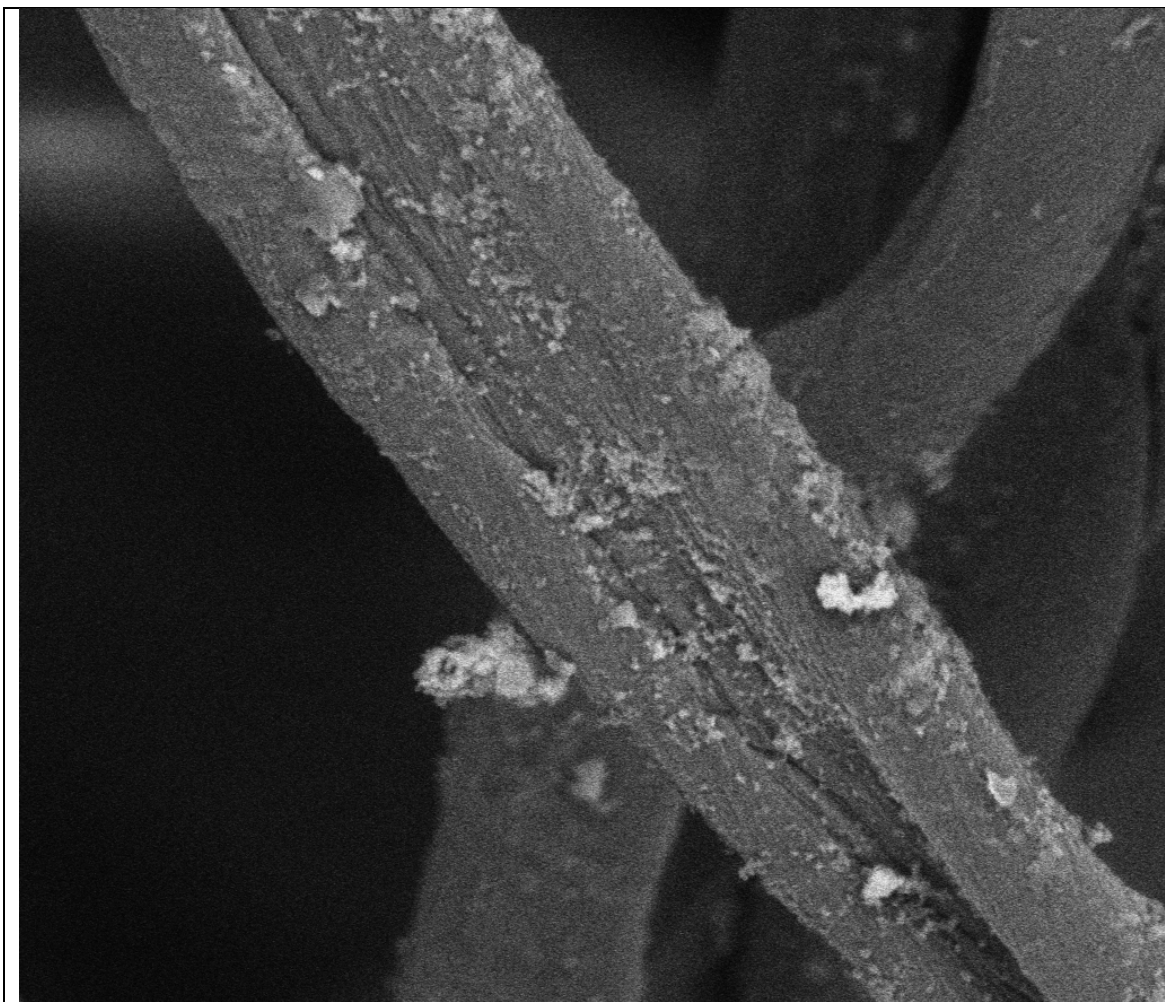

|             |          |      |         |         |     |         |   |                     |
|-------------|----------|------|---------|---------|-----|---------|---|---------------------|
| 5/30/2018   | HV       | spot | WD      | HFWD    | det | mag     | ▣ | 10 µm               |
| 11:47:34 AM | 10.00 kV | 4.0  | 18.0 mm | 49.7 µm | CBS | 3 000 x |   | Queen'sU Quanta 250 |

Figure S3: Scanning Electron Micrograph of cotton fibres with *P. rubra* DSM-6842 biofilm adhering to its surface. Microcolonies are visible as large clusters of cells, individual cells are also seen adhering to the surface of the cotton fibres.

***P. luteoviolacea* 2ta16**

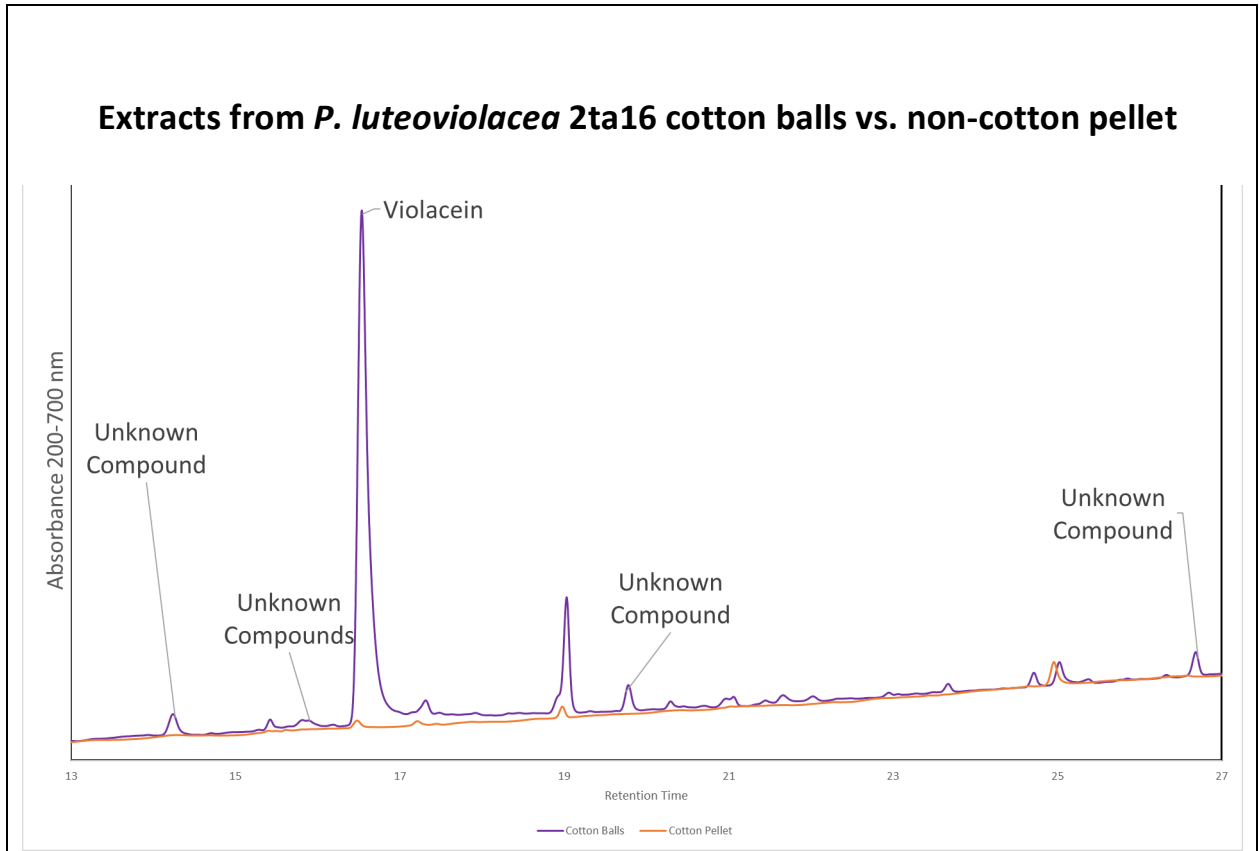

Figure S4: UPLC-PDA trace of methanol extracts of cotton balls from cotton containing culture, as well as methanol extract of cell pellets from non-cotton containing cultures of *P. luteoviolacea* 2ta16.

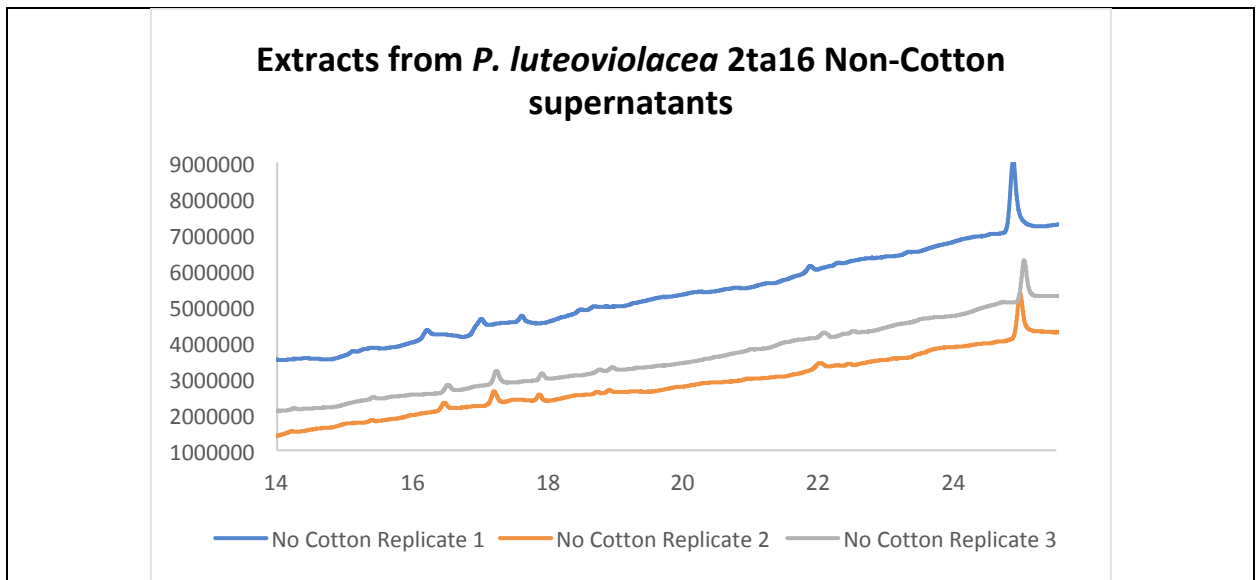

Figure S5: UPLC-PDA Trace of ethyl-acetate extracts from biological replicates of planktonic cultures of *P. luteoviolacea* 2ta16.

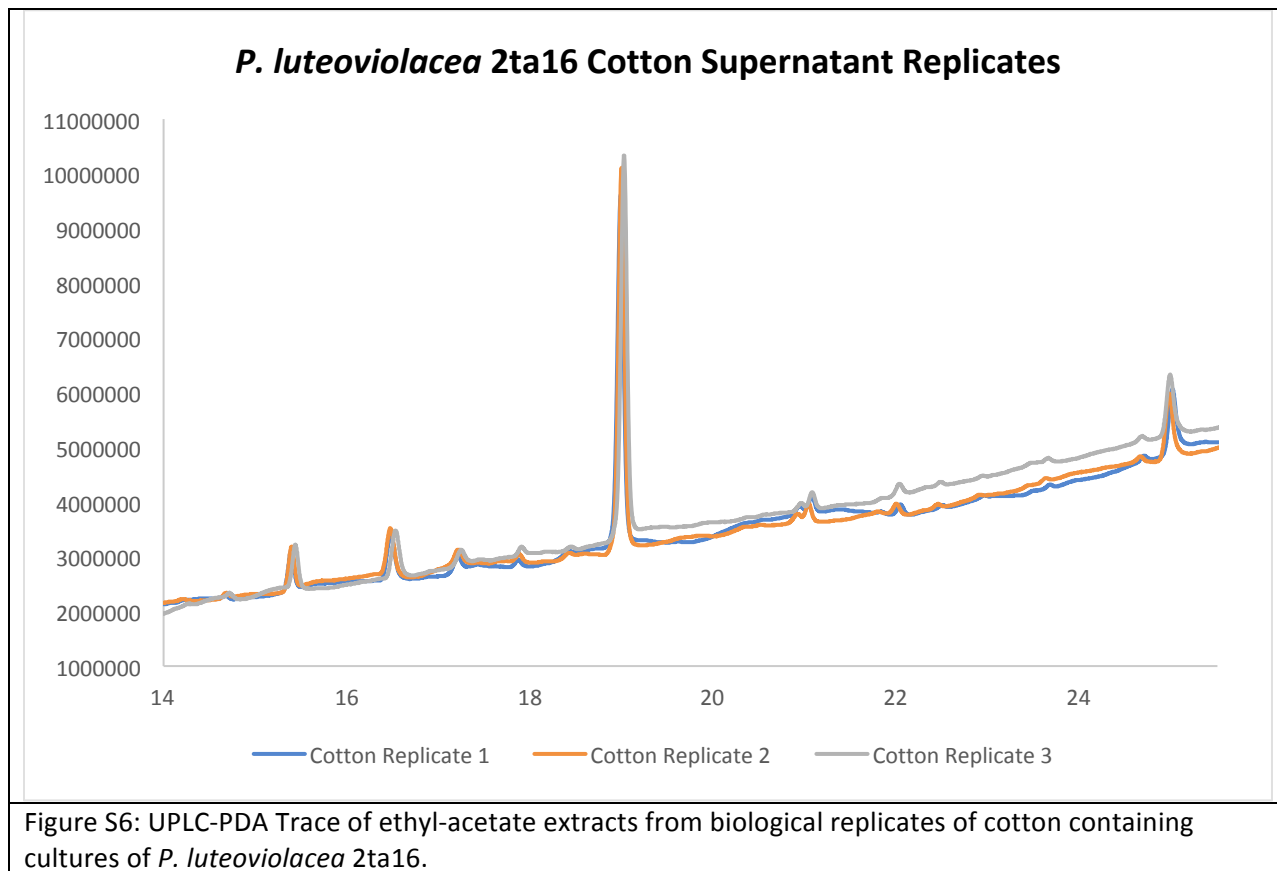

**Extracts from *P. piscicida* JCM 20779 cotton and non-cotton culture supernatants**

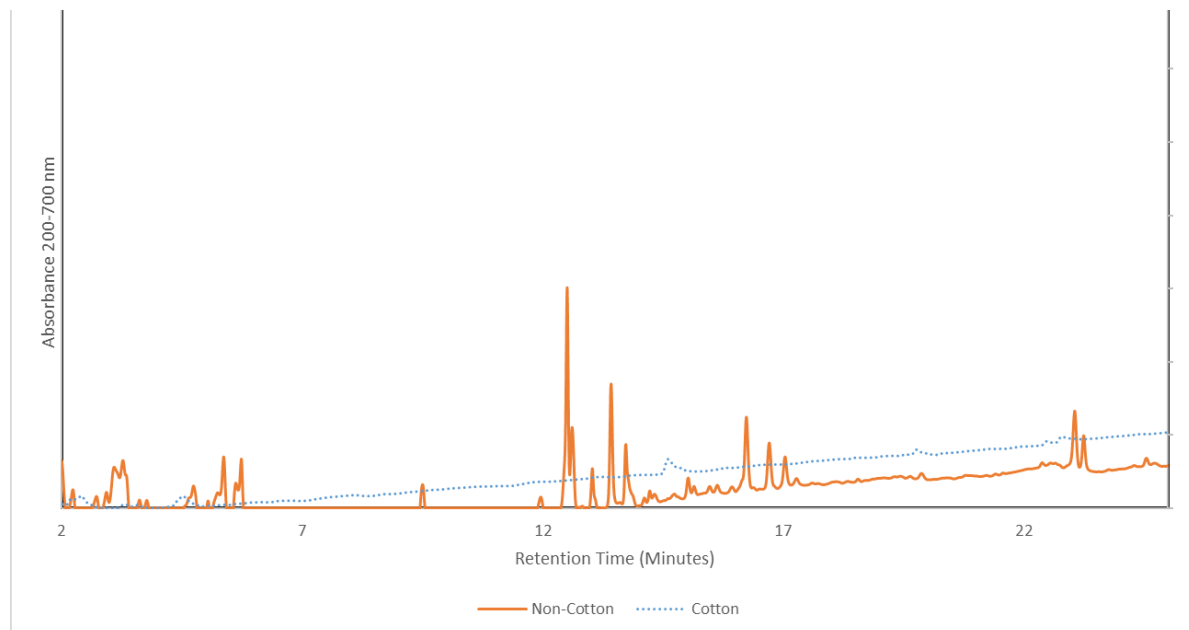

**Figure S7:** UPLC-PDA trace of ethyl acetate extracts of cell free supernatants from *P.piscicida* JCM 20779

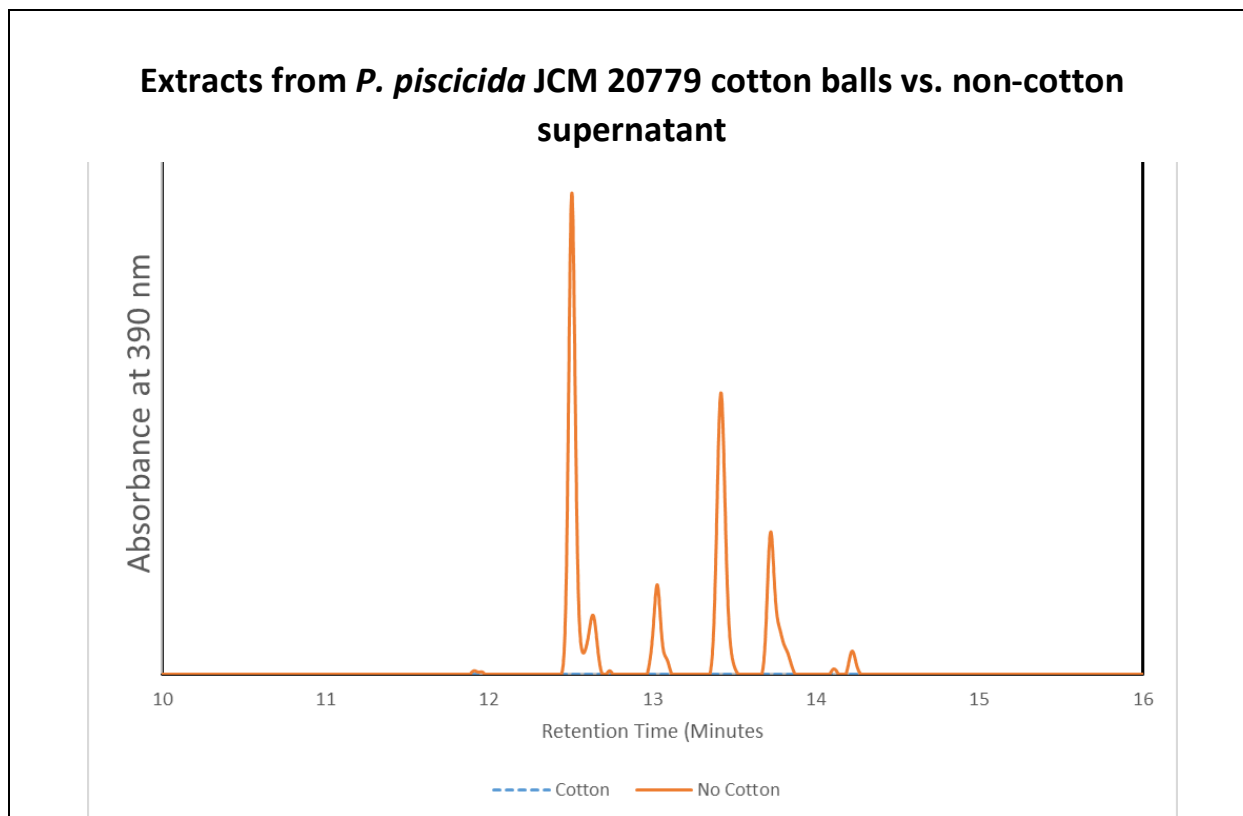

**Figure S8:** UPLC-PDA chromatograms of ethyl acetate extracts of cell-free supernatants from cultures of *P. piscicida* JCM 20779 grown with and without cotton. Absorbance at 390 nm is indicative of alterochromide family members.

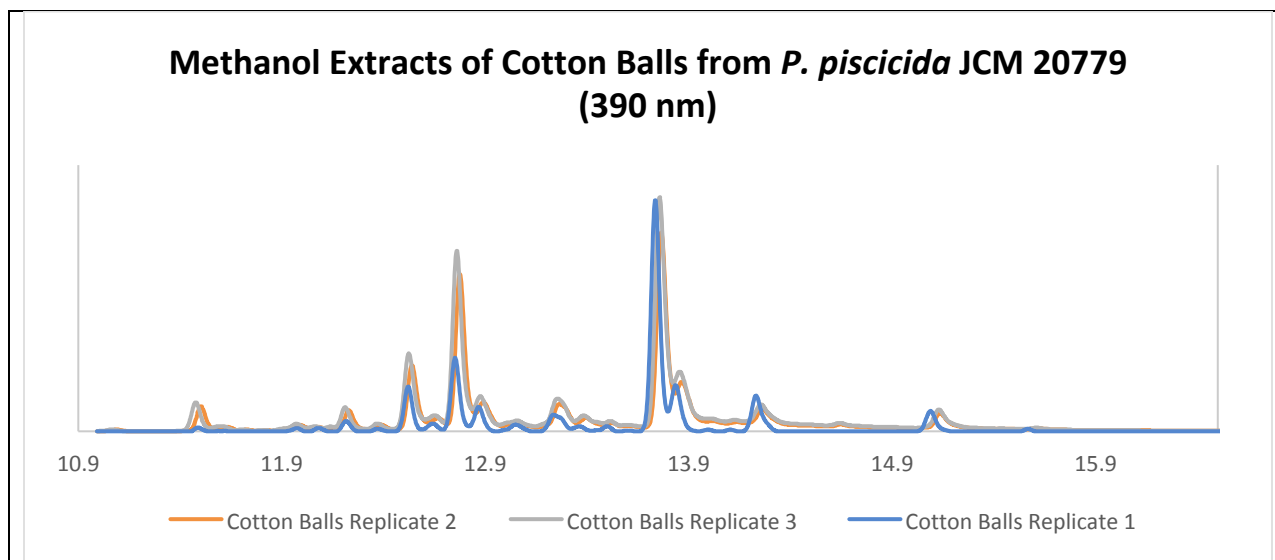

**Figure S9:** UPLC-PDA Trace of methanol extracts from biological replicates of cotton containing cultures of *P. piscicida* JCM 20779.



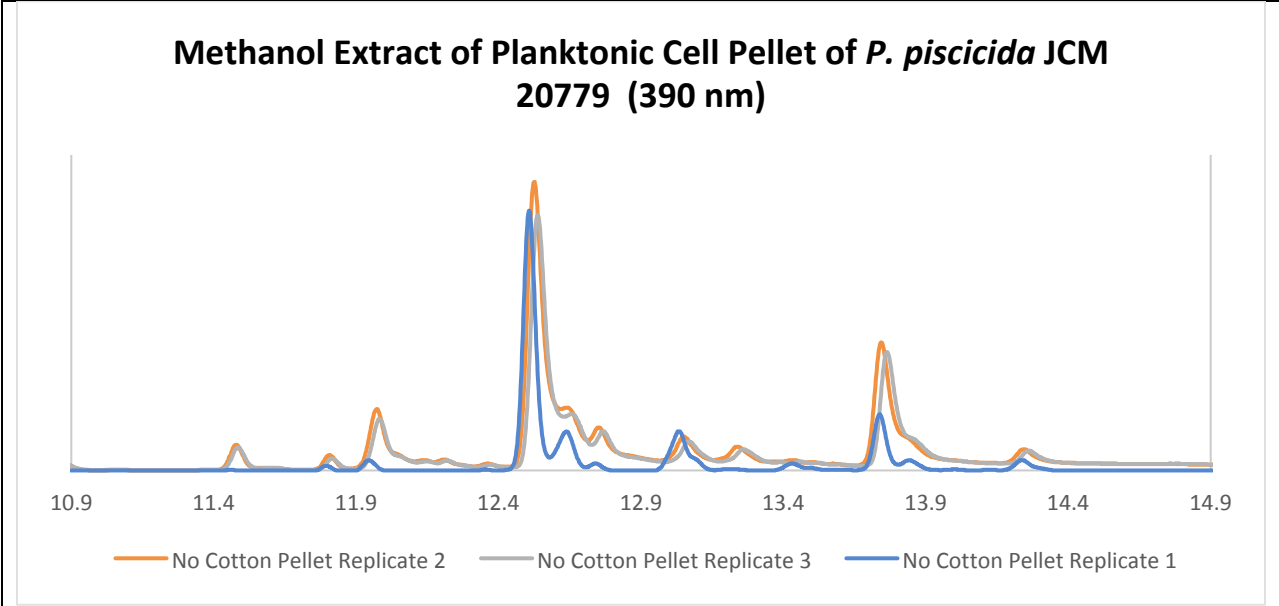

Figure S10: UPLC-PDA Trace of methanol extracts from biological replicates of planktonic cultures of *P. piscicida* JCM 20779.

***P. rubra* DSM-6842**

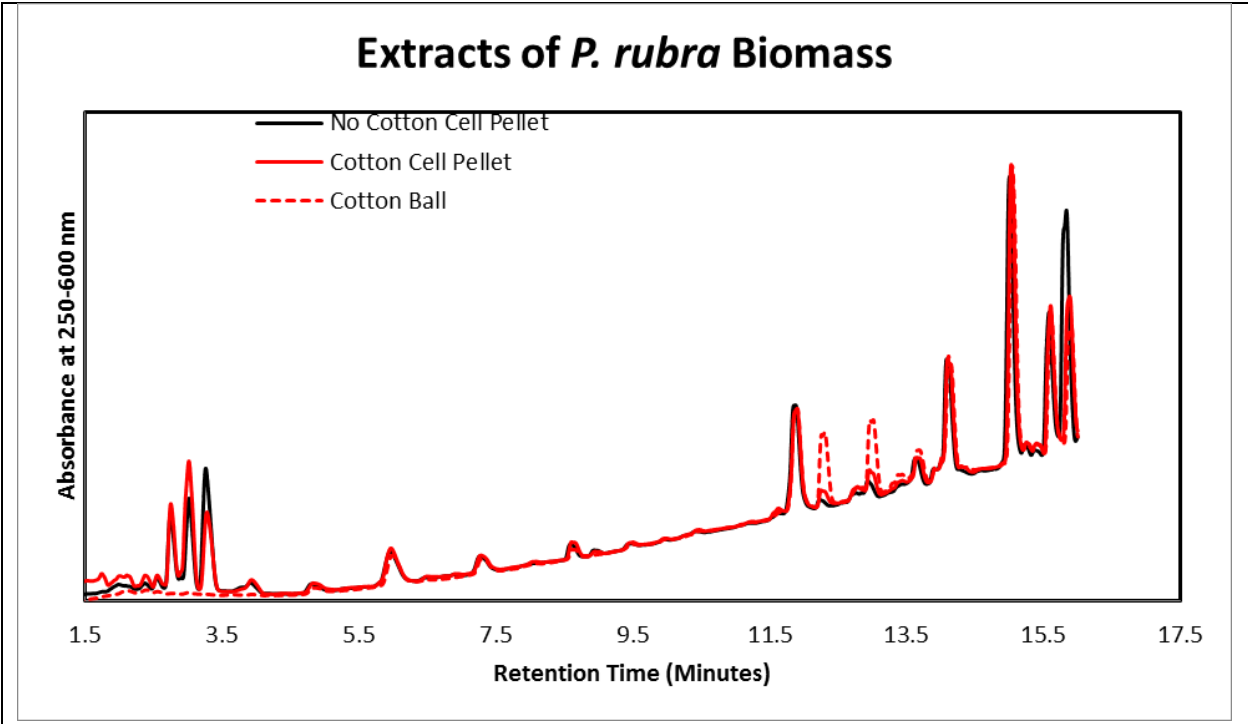

Figure S11: Averaged UPLC-PDA chromatograms of methanol extracts of *P. rubra* DSM-6842 biomass from cultures containing cotton scaffold and cultures lacking cotton scaffold.

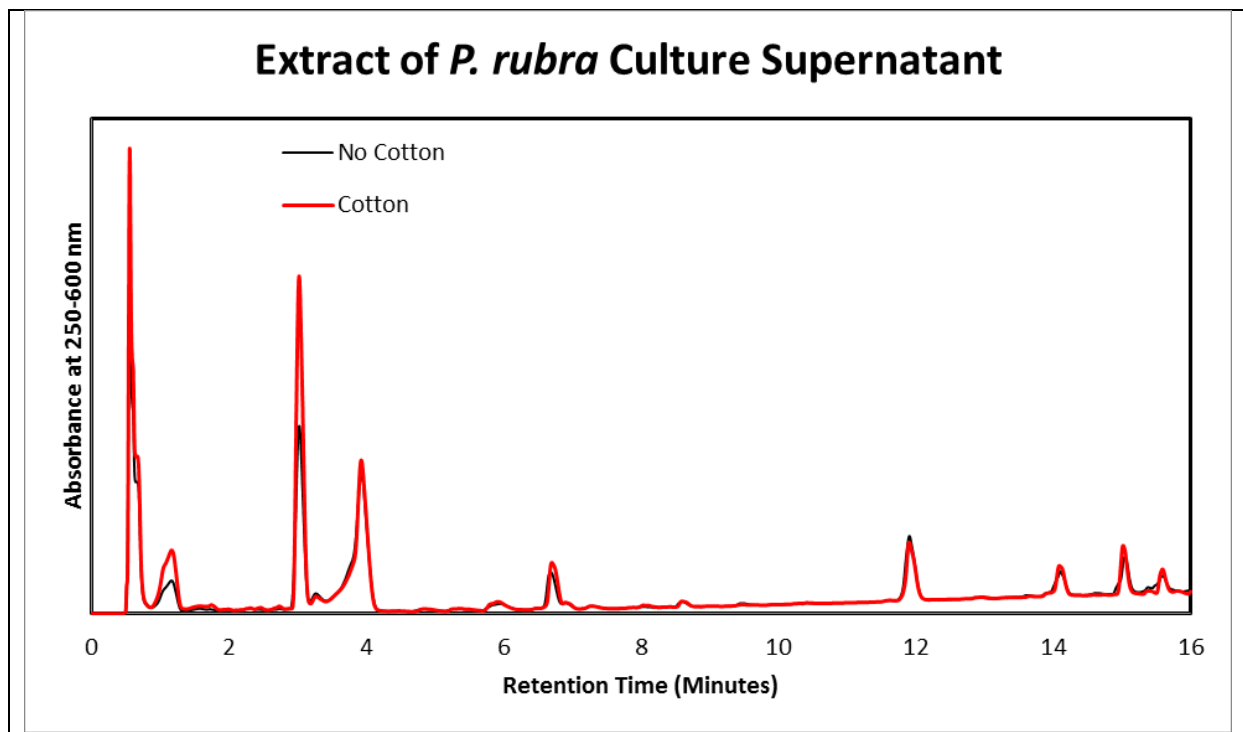

**Figure S12:** Averaged UPLC-PDA chromatograms of ethyl acetate extracts of cell-free supernatants from cultures of *P. rubra* DSM-6842 grown with and without cotton scaffolds.

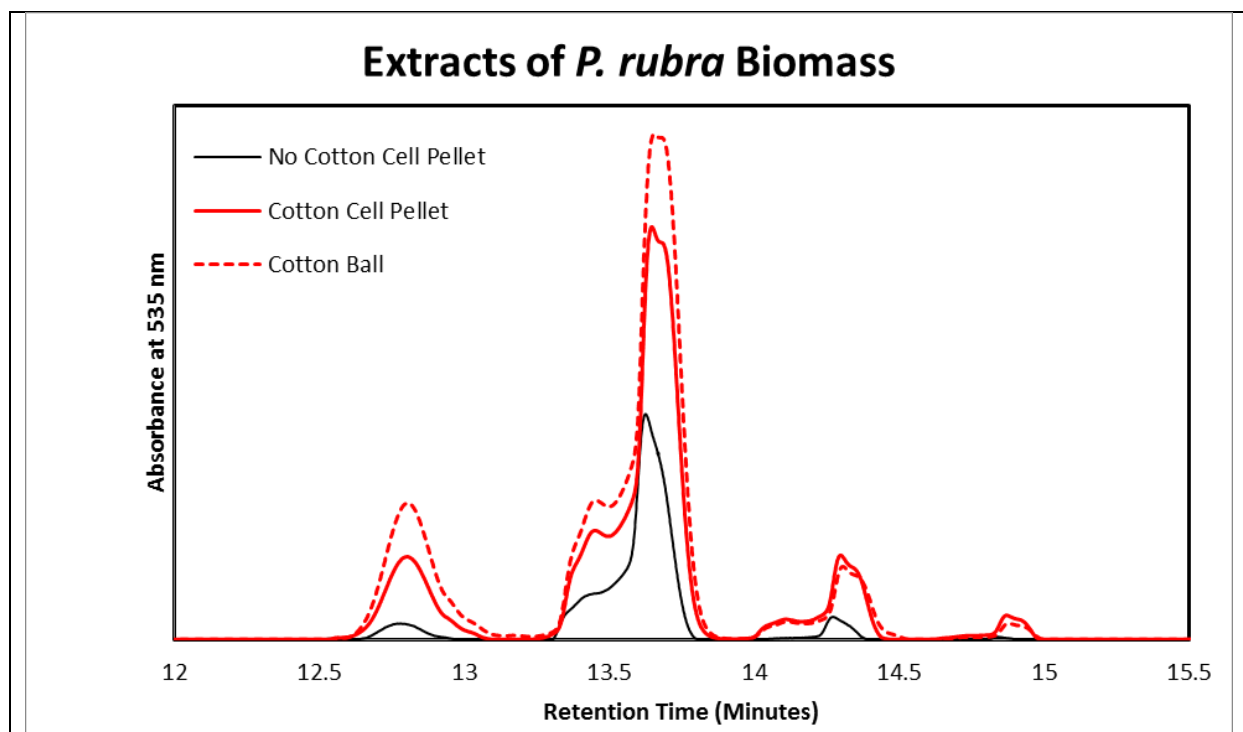

**Figure S13:** Averaged UPLC-PDA chromatograms of extracts from the biomass of cultures of *P. rubra* DSM-6842 grown with and without cotton scaffolds. Compounds identified are Cycloprodigiosin/4''-(n-butyl)prodigiosin (Co-eluted at 12.8 minutes, Prodigiousin (RT = 13.69 minutes), and 4''-(n-hexyl)prodigiosin (RT = 14.35), and 4''-(n-heptyl)prodigiosin (RT = 14.87)

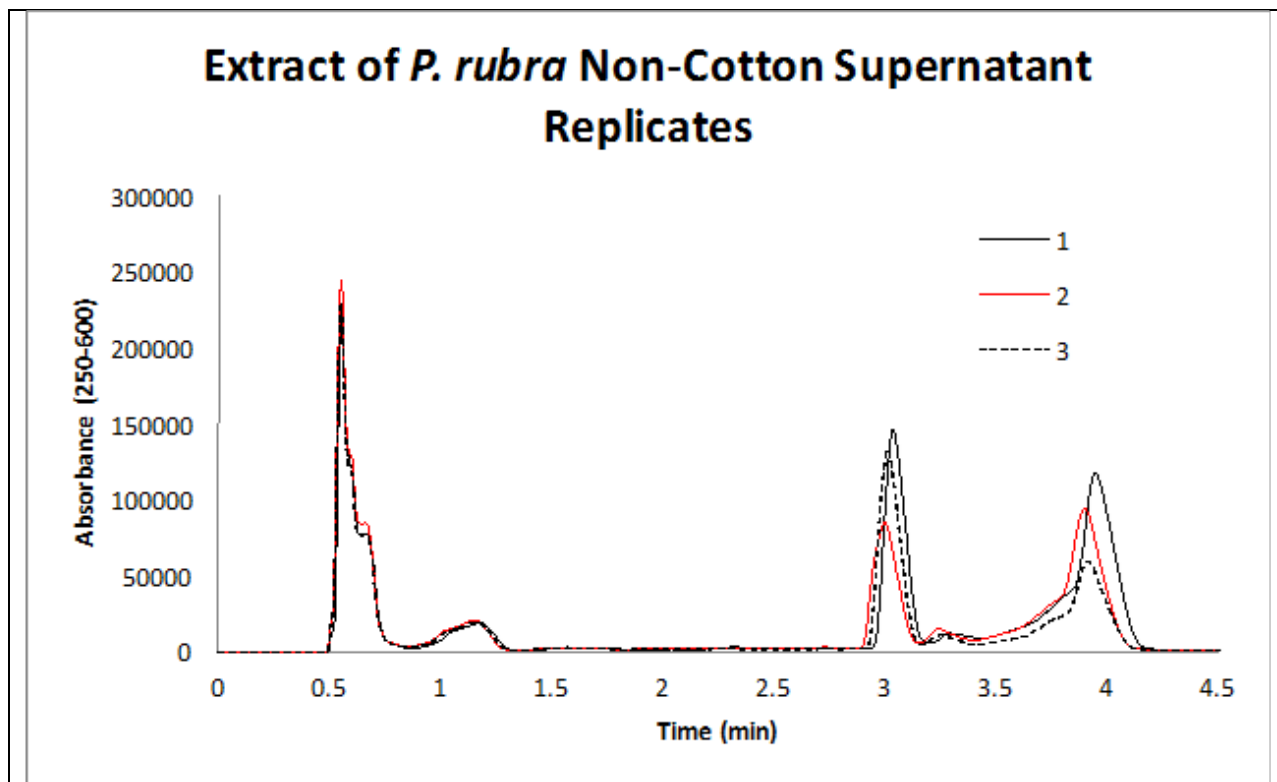

**Figure S14:** UPLC-PDA Traces of ethyl acetate extracts from biological replicates of planktonic cultures of *P. rubra* DSM-6842.

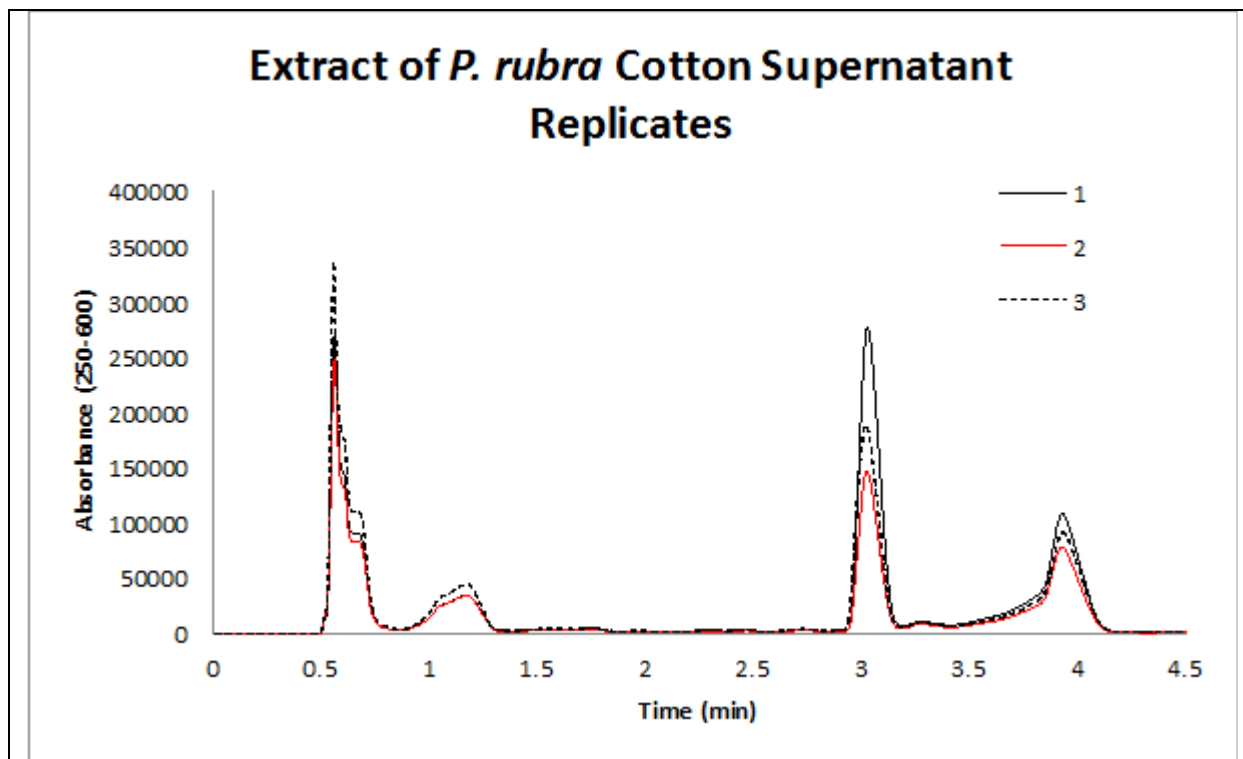

**Figure S15:** UPLC-PDA Traces of ethyl acetate extracts from biological replicates of cotton containing cultures of *P. rubra* DSM-6842.

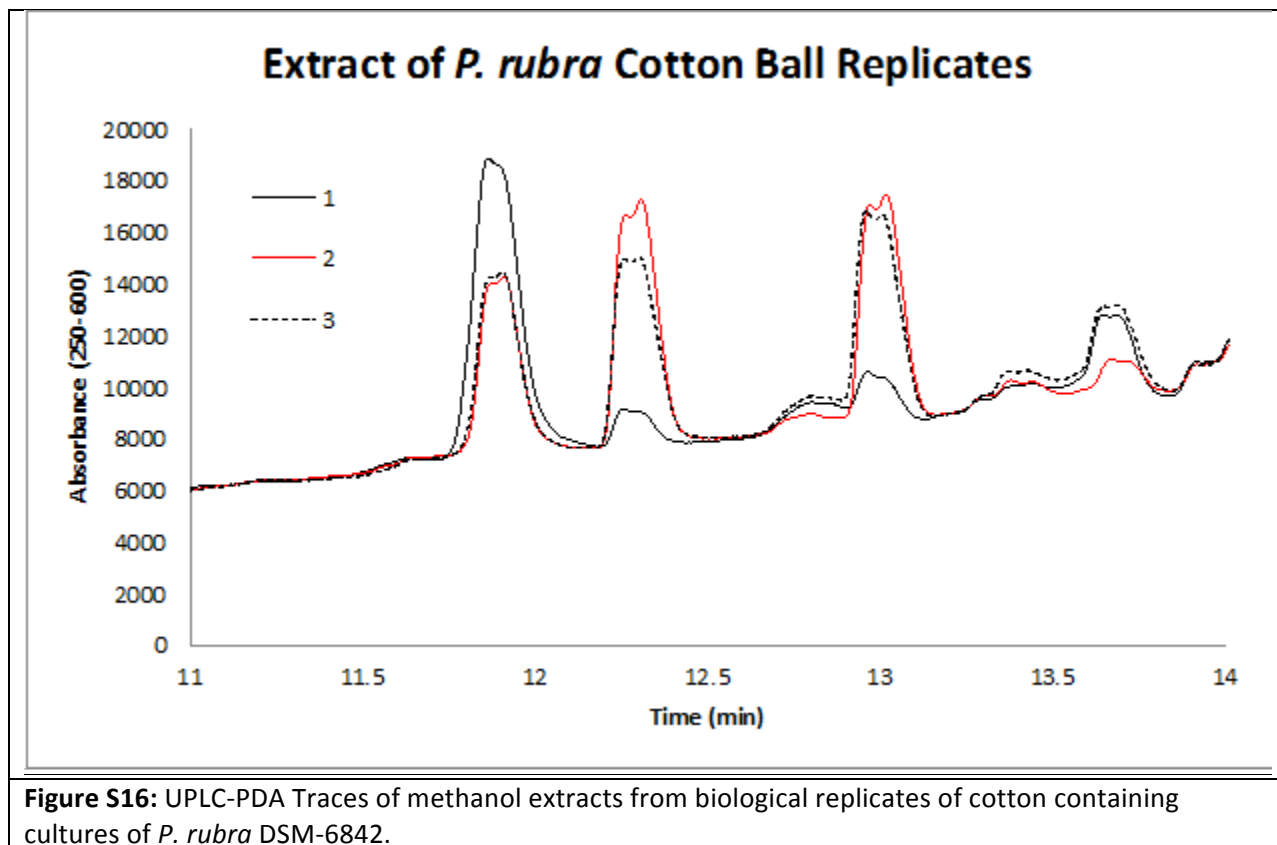

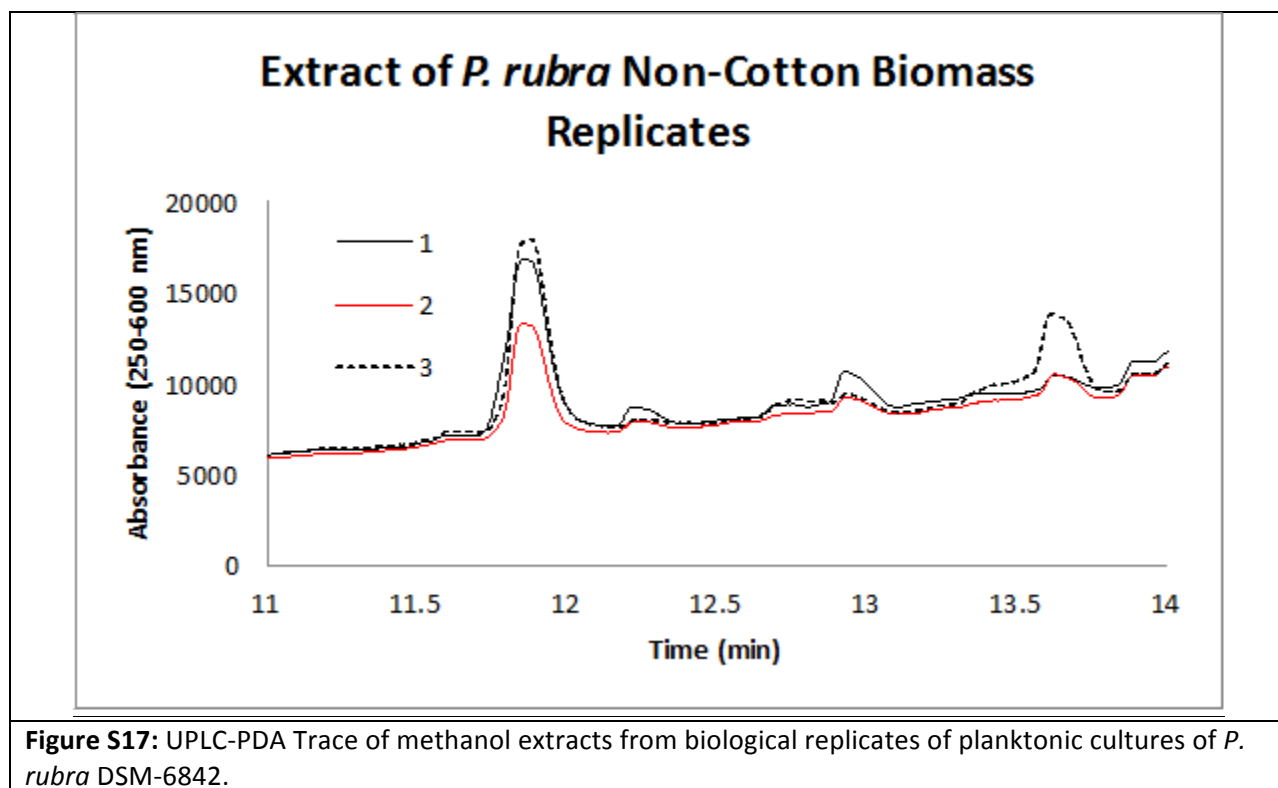

**Figure S17:** UPLC-PDA Trace of methanol extracts from biological replicates of planktonic cultures of *P. rubra* DSM-6842.

**Table S2:** Retention Times and Masses of known compounds based on dereplication using Marinlit [2]

| <i>Pseudoalteromonas luteoviolacea</i> 2ta16 |                  |                     |                                                        |                          |
|----------------------------------------------|------------------|---------------------|--------------------------------------------------------|--------------------------|
| Compound                                     | Calculated (M+H) | Observed <i>m/z</i> | Observed Adducts                                       | Retention Time (Minutes) |
| Violacein                                    | 344.10           | 344.07              | (M+Na)                                                 | 16.49                    |
| Thiomarinol A                                | 641.80           | 641.37              | (M+Na)                                                 | 19.02                    |
| <i>P. piscicida</i> JCM20779                 |                  |                     |                                                        |                          |
| Compound                                     | Calculated (M-H) | observed <i>m/z</i> | observed adducts                                       | Retention Time (Minutes) |
| Alterochromide A/A'                          | 764.37           | 764.29              | (M-H+CH <sub>2</sub> O <sub>2</sub> )<br>810.28        | 11.55/11.65              |
| Bromoalterochromide A/A'                     | 842.28/844.28    | 842.15/844.09       | (M-H+CH <sub>2</sub> O <sub>2</sub> )<br>888.05/890.00 | 12.82/13.08              |
| Alterochromide A''                           | 750.36           | 750.56              | (M-H+CH <sub>2</sub> O <sub>2</sub> )<br>796.30        | 10.94                    |

| Bromoalterochromide A''            | 828.27/830.27   | 828.10/830.09       | (M-H+CH <sub>2</sub> O <sub>2</sub> )<br>874.15/876.03 | 12.28                    |
|------------------------------------|-----------------|---------------------|--------------------------------------------------------|--------------------------|
| Alterochromide B/B'                | 790.39          | 790.28              | (M-H+CH <sub>2</sub> O <sub>2</sub> )<br>836.27        | 12.55/12.69              |
| Bromoalterochromide B/B'           | 868.30/870.30   | 868.15/870.14       | (M-H+CH <sub>2</sub> O <sub>2</sub> )<br>914.05/916.08 | 13.77/13.87              |
| Alterochromide B''                 | 776.37          | 776.24              | (M-H+CH <sub>2</sub> O <sub>2</sub> )<br>822.22        | 12.00                    |
| Bromoalterochromide B''            | 854.28/856.28   | 854.03/856.24       | (M-H+CH <sub>2</sub> O <sub>2</sub> )<br>900.12/902.27 | 13.26                    |
| <b><i>P. rubra</i> DSM-6842</b>    |                 |                     |                                                        |                          |
| Compound                           | Predicted (M+H) | Observed <i>m/z</i> | Observed Adducts                                       | Retention Time (Minutes) |
| Cycloprodigiosin                   | 322.19          | 322.08              | n/a                                                    | 12.8                     |
| 4''-( <i>n</i> -butyl)prodigiosin  | 310.14          | 310.04              | n/a                                                    | 12.8                     |
| Prodigiosin                        | 324.21          | 324.06              | (2M+2H+Cl)<br>683.29                                   | 13.69                    |
| 4''-( <i>n</i> -hexyl)prodigiosin  | 338.22          | 338.09              | n/a                                                    | 14.35                    |
| 4''-( <i>n</i> -heptyl)prodigiosin | 352.24          | 352.16              | n/a                                                    | 14.87                    |

**Table S3: List of Other Secondary Metabolites Known to be Produced by *Pseudoalteromonas rubra*, *Pseudoalteromonas piscicida* or *Pseudoalteromonas luteoviolacea* but not detected in these experiments based on data from Marinlit [2]**

| <b><i>P. rubra</i></b>                  |                        |                                |                                                                     |
|-----------------------------------------|------------------------|--------------------------------|---------------------------------------------------------------------|
| Compound                                | Molecular Mass         | Reference                      | Notes:                                                              |
| 2-( <i>p</i> -hydroxybenzyl)prodigiosin | 429.24                 | DOI: 10.1021/np800493p         | Strain not specified in this paper.                                 |
| Pseudoalteromone A                      | 320.38                 | DOI: 10.1007/s00253-014-5530-0 | Described in strain QD1-2                                           |
| alkyl-quinolinones                      | 215.13, 243.16, 271.19 | DOI: 10.3390/md14070129        | Described in strain DSM-6842, as well as <i>P. piscicida</i> A1-J11 |
| <b><i>P. piscicida</i></b>              |                        |                                |                                                                     |
| Norharman                               | 168.199                | DOI: 10.1042/BA20050176        | Described in strain NJ6-3-1                                         |
| Alteramide A                            | 496.26                 | DOI: 10.3390/md14070129        | Described in strain OT59                                            |
| <b><i>P. luteoviolacea</i></b>          |                        |                                |                                                                     |
| Pentabromopseudilin                     | 548.62                 | DOI: 10.1038/nchembio.1564     | Described in strain I-L-33 and 2ta16                                |



|                                                    |                                                                |                                |                                      |
|----------------------------------------------------|----------------------------------------------------------------|--------------------------------|--------------------------------------|
| Various Bromophenol/bromopyrroles and their dimers | 497.71, 599.53, 627.56, 525.74, 249.86, 327.77, 300.77, 378.68 | DOI: 10.1038/nchembio.1564     | Described in strain I-L-33 and 2ta16 |
| Cyclo-(L-prolyl-L-glycine)                         | 154.14                                                         | DOI: 10.1080/10575630008043781 | Strain not Described                 |
| Cyclo-(L-phenylalanyl-4R-hydroxy-L-proline)        | 260.24                                                         | DOI: 10.1080/10575630008043781 | Strain not Described                 |
| 2,4-dibromo-6chlorophenol                          | 283.82                                                         | DOI: 10.1080/10575630008043781 | Strain not Described                 |
| Indolmycin                                         | 257.06                                                         | DOI: 10.1021/np100151y         | Described in strain NCIMB 2035       |
| 4-hydroxy benzaldehyde                             | 122.04                                                         | DOI: 10.3390/md14070129        | Described in strain I-L-33           |
| <i>n</i> -propyl-3-hydroxybenzoate                 | 180.08                                                         | DOI: 10.3390/md14070129        | Described in strain I-L-33           |
| Thiomarinols B,C,D,E,F, G                          | 672.80, 624.81, 654.83, 668.86, 638.79, 624.81                 | DOI: 10.3390/md14070129        | Described in strain SANK 73390       |
| Xenorhabdins,                                      | 338.15, 366.18, 336.13, 392.2, 420.23                          | DOI: 10.3390/md14070129        | Described in strain SANK 73390       |

**Table S4: Statistical analysis of metabolite profiles\***

| <b><i>P. luteoviolacea</i></b>               |                                                                                                            |                                                                                                                   |                                   |
|----------------------------------------------|------------------------------------------------------------------------------------------------------------|-------------------------------------------------------------------------------------------------------------------|-----------------------------------|
| Compound                                     | Average Peak Area in planktonic culture (AU). [Standard Deviation]                                         | Average peak area in cotton containing culture (AU). [Standard Deviation]                                         | P Value (Paired Student's T test) |
| Violacein                                    | 0 (Not detected)                                                                                           | 99068.27 [20543.4]                                                                                                | 0.014                             |
| Thiomarinol A                                | 0 (Not detected)                                                                                           | 567851.50 [24149.8]                                                                                               | 6.0X10 <sup>-4</sup>              |
| <b><i>P. piscicida</i></b>                   |                                                                                                            |                                                                                                                   |                                   |
| Compound                                     | Average ratio of Brominated analogue to non-brominated analogue in planktonic culture [Standard Deviation] | Average ratio of Brominated analogue to non-brominated analogue in cotton containing culture [Standard Deviation] | P Value (Paired Student's T test) |
| Bromoalterochromide A/A':Alterochromide A/A' | 3.55 [0.276]                                                                                               | 9.39 [1.415]                                                                                                      | 0.024                             |

|                                      |                                                                              |                                                                                     |                                          |
|--------------------------------------|------------------------------------------------------------------------------|-------------------------------------------------------------------------------------|------------------------------------------|
| Bromoalterochromide                  | 0.39                                                                         | 4.025                                                                               | 0.028                                    |
| B/B':Alterochromide B/B'             | [0.148]                                                                      | [1.159]                                                                             |                                          |
| <b><i>P. rubra</i></b>               |                                                                              |                                                                                     |                                          |
| Compound                             | <u>Average Peak Area in planktonic culture (AU).</u><br>[Standard Deviation] | <u>Average peak area in cotton containing culture (AU).</u><br>[Standard Deviation] | <u>P Value (Paired Student's T test)</u> |
| Unknown compound at 12.29 minutes RT | 622.6<br>[287.8]                                                             | 9155.6<br>[5161.7]                                                                  | 0.15125                                  |
| Unknown compound at 12.96 minutes RT | 1586.3<br>[273.6]                                                            | 8869.6<br>[5836]                                                                    | 0.23385                                  |
| Cycloprodigiosin                     | 10695.33<br>[8628.3]                                                         | 25597.67<br>[11485.98]                                                              | 0.162958                                 |
| Prodigiosin                          | 87475<br>[53979.75]                                                          | 96010.33<br>[32157.31]                                                              | 0.831869                                 |
| 4''-( <i>n</i> -hexyl) prodigiosin   | 12503.0<br>[9168.827]                                                        | 14142.67<br>[5693.175]                                                              | 0.810407                                 |
| 4''-( <i>n</i> -heptyl) prodigiosin  | 3012.333<br>[2300.602]                                                       | 3956.333<br>[1580.594]                                                              | 0.566131                                 |

\*Analysis was performed using the Analysis ToolPak module of Microsoft Excel based on the following formula for *t* statistic:

$$t = \frac{\bar{x} - \bar{y} - \Delta_0}{\sqrt{\frac{S_1^2}{m} + \frac{S_2^2}{n}}}$$

- 1 Blin, K. *et al.* (2017) antiSMASH 4 . 0 — improvements in chemistry prediction and gene cluster boundary identification. *Nucleic Acids Res.* **45**, 36–41
- 2 Royal Society of Chemistry (2018) , MarinLit - A database of the marine natural products literature. [Online]. Available: <http://pubs.rsc.org/marinlit/>. [Accessed: 15-May-2018]
